# Supplementary material for: FRAS1-related extracellular matrix 3 (FREM3) single-nucleotide polymorphism effects on gene expression, amygdala reactivity and perceptual processing speed: An accelerated aging pathway of depression risk
Source: Front Psychol. 2015 Sep 16;6:1377. doi: 10.3389/fpsyg.2015.01377 (PMC4584966; doi:10.3389/fpsyg.2015.01377)
Supplement: Supplementary file 2 [file Table2.XLSX]

## Sheet: Supp_Table_2
	Genotype distribution			BA11				BA47				Combined
SNP	AA	Aa	aa	t	p	LR aa vs AA	LR Aa vs AA	t	p	LR aa vs AA	LR Aa vs AA	AW P		Supplementary Table 2. Summary of single nucleotide polymorphism (SNP) effects on FREM3 gene expression in Brodmann areas 11 and 47 (BA11 and BA47) in the postmortem cohort.
rs1391187	52	88	28	4.396	2.081e-05	0.341	0.2	4.811	3.629e-06	0.488	0.2	4.87e-09		AA = major allele homozygotes
rs13120490	53	89	27	4.455	1.628e-05	0.345	0.19	4.567	1.025e-05	0.468	0.172	1.04e-08		Aa = heterozygotes
rs7679278	52	89	28	4.351	2.49e-05	0.332	0.189	4.337	2.636e-05	0.445	0.148	3.82e-08		aa = minor allele homozygotes
rs965339	51	89	29	4.178	4.979e-05	0.324	0.177	4.468	1.547e-05	0.45	0.164	4.45e-08		LR = log ratio
rs1553069	51	89	29	4.591	9.268e-06	0.326	0.233	3.977	0.0001081	0.383	0.154	5.71e-08
rs1450237	51	89	29	4.591	9.268e-06	0.326	0.233	3.977	0.0001081	0.383	0.154	5.71e-08
rs7676225	51	89	29	4.591	9.268e-06	0.326	0.233	3.977	0.0001081	0.383	0.154	5.71e-08
rs10009203	56	90	22	4.805	3.717e-06	0.383	0.335	3.684	0.0003205	0.387	0.21	6.73e-08
rs980652	56	89	24	4.647	7.312e-06	0.385	0.325	3.863	0.0001663	0.415	0.203	6.86e-08
rs1497608	53	87	29	4.316	2.866e-05	0.317	0.225	3.833	0.0001859	0.386	0.162	2.78e-07
rs1497608	53	87	29	4.316	2.866e-05	0.317	0.225	3.833	0.0001859	0.386	0.162	2.78e-07
rs12502464	56	88	25	4.174	5.056e-05	0.331	0.242	3.899	0.0001455	0.438	0.213	3.77e-07
rs11725705	51	89	27	4.38	2.218e-05	0.324	0.202	3.633	0.0003838	0.366	0.14	4.32e-07
rs1018092	55	88	26	4.011	9.512e-05	0.31	0.229	4.014	9.413e-05	0.429	0.208	4.53e-07
rs7653970	50	90	29	4.249	3.749e-05	0.299	0.191	3.702	0.0002995	0.365	0.125	5.61e-07
rs2060657	74	76	19	-4.036	8.634e-05	-0.335	-0.114	-3.537	0.0005385	-0.364	-0.129	2.13e-06
rs11100801	62	87	20	3.988	0.0001039	0.36	0.267	2.529	0.01248	0.295	0.158	4.71e-05
rs1497614	51	88	24	3.003	0.00313	0.226	0.205	3.473	0.0006736	0.397	0.185	7.36e-05
rs1826927	77	78	14	3.217	0.001587	0.12	0.281	2.543	0.01199	0.224	0.189	0.000545
rs11938715	67	74	28	-2.405	0.01739	-0.165	-0.0332	-2.787	0.006005	-0.149	-0.122	0.00249
rs13135254	73	79	15	2.935	0.003862	0.184	0.212	1.938	0.05448	0.206	0.16	0.00461
rs1450244	141	27	1	2.374	0.01886	0.467	0.188	1.459	0.1467	0.695	0.0967	0.0406
rs12108393	141	27	1	2.374	0.01886	0.467	0.188	1.459	0.1467	0.695	0.0967	0.0406
rs17690723	130	30	1	1.993	0.04804	-0.376	0.127	1.847	0.06671	-0.343	0.171	0.0462
rs11723113	69	78	21	1.899	0.05949	0.199	0.0681	1.808	0.07254	0.235	0.0412	0.0587
rs12512649	61	84	22	1.955	0.05242	0.163	0.0958	1.722	0.08716	0.217	0.0659	0.0615
rs6835827	70	78	21	1.878	0.06229	0.199	0.0683	1.761	0.0803	0.232	0.0383	0.0661
rs11728121	70	78	21	1.878	0.06229	0.199	0.0683	1.761	0.0803	0.232	0.0383	0.0661
rs6537170	70	78	21	1.878	0.06229	0.199	0.0683	1.761	0.0803	0.232	0.0383	0.0661
rs4835333	70	78	21	1.878	0.06229	0.199	0.0683	1.761	0.0803	0.232	0.0383	0.0661
rs11727223	70	78	21	1.878	0.06229	0.199	0.0683	1.761	0.0803	0.232	0.0383	0.0661
rs4350958	65	80	21	1.735	0.08475	0.177	0.0528	1.847	0.06667	0.224	0.0386	0.0728
rs13147386	65	82	22	1.786	0.07619	0.153	0.0778	1.752	0.08175	0.212	0.0601	0.0786
rs5016159	65	82	22	1.786	0.07619	0.153	0.0778	1.752	0.08175	0.212	0.0601	0.0786
rs5015760	65	82	22	1.786	0.07619	0.153	0.0778	1.752	0.08175	0.212	0.0601	0.0786
rs2323190	65	82	22	1.786	0.07619	0.153	0.0778	1.752	0.08175	0.212	0.0601	0.0786
rs13135034	65	82	22	1.786	0.07619	0.153	0.0778	1.752	0.08175	0.212	0.0601	0.0786
rs2218791	65	82	22	1.786	0.07619	0.153	0.0778	1.752	0.08175	0.212	0.0601	0.0786
rs13134327	65	82	22	1.786	0.07619	0.153	0.0778	1.752	0.08175	0.212	0.0601	0.0786
rs13119602	65	82	22	1.786	0.07619	0.153	0.0778	1.752	0.08175	0.212	0.0601	0.0786
rs13133444	65	82	22	1.786	0.07619	0.153	0.0778	1.752	0.08175	0.212	0.0601	0.0786
rs5015757	65	82	22	1.786	0.07619	0.153	0.0778	1.752	0.08175	0.212	0.0601	0.0786
rs13134327	65	82	22	1.786	0.07619	0.153	0.0778	1.752	0.08175	0.212	0.0601	0.0786
rs6537170	70	78	21	1.767	0.07922	0.199	0.0683	1.761	0.0803	0.232	0.0383	0.08
rs5016160	64	82	22	1.779	0.07724	0.153	0.0771	1.705	0.09024	0.21	0.0573	0.0859
rs41355648	134	27	4	1.633	0.1046	0.0305	0.0789	1.729	0.08584	0.106	0.136	0.105
rs2270677	48	81	38	-1.134	0.2588	-0.0821	0.0576	-0.552	0.5818	-0.0818	0.00627	0.451
rs1450242	106	56	5	-1.098	0.2741	-0.51	-0.055	0.01798	0.9857	-0.0821	-0.0906	0.473
rs4690793	101	55	13	-0.9948	0.3214	-0.16	-0.0808	0.294	0.7691	-0.0876	-0.0058	0.54
rs6847190	50	82	37	-0.9885	0.3245	-0.0664	0.0663	-0.6578	0.5117	-0.0876	0.0103	0.544
rs7376032	50	82	37	-0.9885	0.3245	-0.0664	0.0663	-0.6578	0.5117	-0.0876	0.0103	0.544
rs11732312	50	80	38	-0.9798	0.3288	-0.08	0.0755	-0.7198	0.4728	-0.0978	0.0191	0.549
rs7688510	102	50	17	-0.8422	0.401	-0.0999	-0.0713	0.07215	0.9426	-0.112	0.032	0.641
rs13143261	116	49	4	-0.828	0.409	-0.462	-0.00223	-0.3672	0.714	-0.0508	-0.138	0.651
rs17747275	102	54	12	-0.7912	0.43	-0.141	-0.058	0.3704	0.7116	-0.101	0.0209	0.675
rs11938298	110	51	6	-0.7765	0.4387	-0.442	-0.0341	-0.4532	0.6511	-0.164	-0.135	0.685
rs13149219	115	48	6	-0.6932	0.4893	-0.439	-0.00548	-0.3376	0.7361	-0.156	-0.12	0.739
rs11732122	48	91	30	0.3281	0.7433	-0.0211	0.0916	-0.158	0.8747	-0.0173	0.0358	0.934
